# Supplementary material for: GERI-BD: A Randomized Double-Blind Controlled Trial of Lithium and Divalproex in the Treatment of Mania in Older Patients With Bipolar Disorder
Source: Atypon-hosted journal article supplement (doi:10.1176/appi.focus.17308), 2019-07-01
Supplement: appi.focus.17308.ds001.pdf [file appi.focus.17308.ds001.pdf]

**FIGURE S1.** Kaplan-Meier Curve of time to attrition for two treatment groups

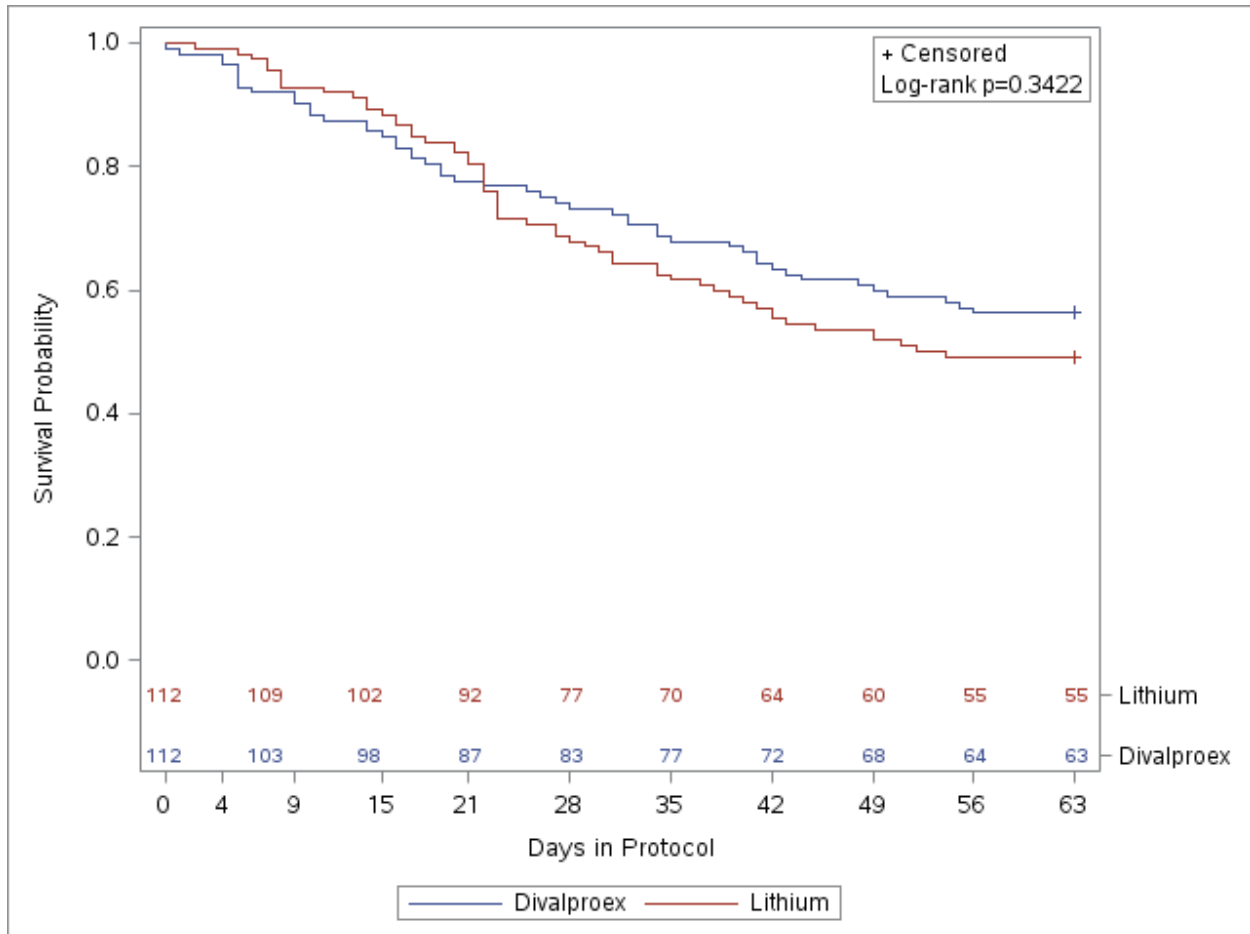

Kaplan-Meier estimates of survival probability for time to attrition of two treatment groups. Number of subjects at risk shown at the bottom of the figure and the p value of the log-rank test (between two treatment groups) shown in the top-right corner inset.

**FIGURE S2.** Young Mania Rating Scale (YMRS) reduction from baseline based on four groups – treatment groups and target serum concentration

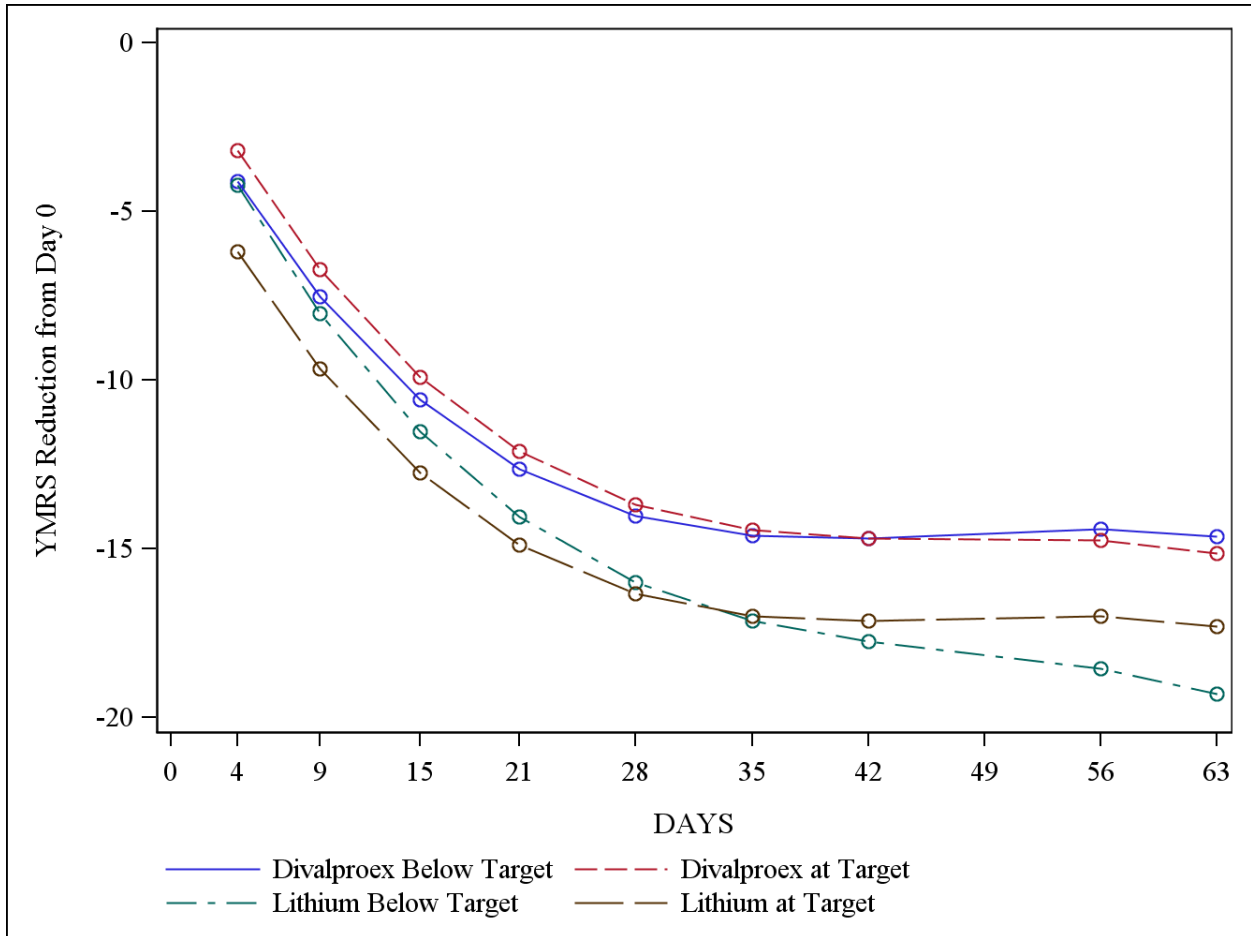

The four lines correspond to Least Square Means (from mixed models) of YMRS Change from Day 0 for four groups based on treatment assignment and whether target serum concentration met concurrently.
